# Supplementary material for: Genome-Assisted Probiotic Characterization and Application of Lactiplantibacillus plantarum 18 as a Candidate Probiotic for Laying Hen Production
Source: MDPI journal article supplement (doi:10.3390/microorganisms11102373), 2023-09-22

Supplementary Table S1. Dietary composition and nutrient levels of the experimental diets (as fed basis)

| Ingredients                     | %      | Nutrient content <sup>c</sup> | Value |
|---------------------------------|--------|-------------------------------|-------|
| Corn                            | 58.98  | Metabolizable energy (MC/kg)  | 2.60  |
| Soybean meal (43)               | 18.22  | Crude protein (%)             | 15.50 |
| Limestone powder (10-20 mesh)   | 9.73   | Crude fibre (%)               | 2.94  |
| DDGS                            | 8.47   | Calcium (%)                   | 3.70  |
| Rice bran meal (15.1%)          | 2.00   | Total phosphorus (%)          | 0.47  |
| Corn germ cake (16.7%)          | 0.79   | Salt (%)                      | 0.36  |
| Rice bran oil                   | 0.60   | K (%)                         | 0.62  |
| Bone Calcium hydrogen phosphate | 0.50   | Na (%)                        | 0.20  |
| NaCl                            | 0.25   | Cl (%)                        | 0.2   |
| Methionine                      | 0.12   | Lysine (%)                    | 0.75  |
| Lysine sulfate (70%)            | 0.10   | Methionine (%)                | 0.37  |
| mineral premix <sup>a</sup>     | 0.10   | <i>DL</i> -Methionine (%)     | 0.63  |
| Choline chloride (50%)          | 0.10   | Threonine (%)                 | 0.58  |
| Multi-vitamins <sup>b</sup>     | 0.03   | Tryptophan (%)                | 0.16  |
| Thermostable phytase (20000)    | 0.01   | Isoleucine (%)                | 0.60  |
| Total                           | 100.00 | Valine (%)                    | 0.72  |

<sup>a</sup> Mineral premix provided the following per kg of diets: Cu, 7,000mg; Fe, 78,000mg; Zn, 65,800mg; Mn, 85,000; I, 550mg; Se, 300mg.

<sup>b</sup> Multi-vitamins provided the following per kg of diets: VA, 4,000 IU; VD3, 1,500 IU; VK3, 15,000 mg; VE, 95,000 IU; VB1, 10,000 mg; VB2, 30,000mg; VB6, 15,000 mg; VB12, 120 mg; Nicotinamide, 50,000mg; D biotin, 500mg; folic acid, 800 mg; D pantothenic acid, 45,000; Choline, 500 mg.

<sup>c</sup> The values of metabolizable energy, available phosphorus, and amino acids are calculated, and others are measured values.

DDGS: Distillers Dried Grains with Solubles

Supplementary Table S2. Genes associated with plantaricin in the LP18 genome

| <b>query</b>      | <b>Description</b>          | <b>Preferred_name</b> |
|-------------------|-----------------------------|-----------------------|
| CHROMOSOME_1_2585 | LytTr DNA-binding domain    | plnD                  |
| CHROMOSOME_1_2587 | -                           | plnF                  |
| CHROMOSOME_1_2592 | CAAX protease self-immunity | plnU                  |

Supplementary Table S3. Genes associated with antibiotic resistance in the LP18 genome of the CARD database

| Contig                                  | NZ_CP016270.1_52                           | NZ_CP016270.1_1972                                      |
|-----------------------------------------|--------------------------------------------|---------------------------------------------------------|
| Start                                   | 53399                                      | 2061681                                                 |
| Stop                                    | 54136                                      | 2061989                                                 |
| Orientation                             | +                                          | -                                                       |
| Cut_Off                                 | Strict                                     | Strict                                                  |
| Pass_Bitscore                           | 50                                         | 75                                                      |
| Best_Hit_Bitscore                       | 86.7                                       | 75.1                                                    |
| Best_Hit_ARO                            | vanY gene in vanB cluster                  | qacJ                                                    |
| Best_Identities                         | 31.33                                      | 40.2                                                    |
| ARO                                     | 3002956                                    | 3007014                                                 |
| Model_type                              | protein homolog model                      | protein homolog model                                   |
| SNPs_in_Best_Hit_A                      |                                            |                                                         |
| RO                                      | n/a                                        | n/a                                                     |
| Other_SNPs                              | n/a                                        | n/a                                                     |
| Drug Class                              | glycopeptide antibiotic                    | disinfecting agents and antiseptics                     |
| Resistance                              |                                            |                                                         |
| Mechanism                               | antibiotic target alteration               | antibiotic efflux                                       |
| AMR Gene Family                         | vanY; glycopeptide resistance gene cluster | small multidrug resistance (SMR) antibiotic efflux pump |
| Percentage Length of Reference Sequence | 91.42                                      | 95.33                                                   |
| ID                                      | gnl BL_ORD_ID 603 hsp_num:0                | gnl BL_ORD_ID 4661 hsp_num:0                            |
| Model_ID                                | 556                                        | 5730                                                    |

Supplementary Table S4. Genes associated with virulence factors in the LP18 genome of the VFDB database

| VFclass          | Virulence factors                                         | Related genes                                        | Lactiplantibacillus<br>plantarum<br>18(Prediction) |
|------------------|-----------------------------------------------------------|------------------------------------------------------|----------------------------------------------------|
|                  |                                                           |                                                      | NZ_CP016270.1                                      |
| Adherence        | BslA                                                      | bslA                                                 | -                                                  |
|                  | Listeria adhesion protein(Listeria)                       | lap                                                  | orf02247                                           |
|                  | Streptococcal plasmin<br>receptor/GAPDH(Streptococcus)    | plr/gapA                                             | orf02888                                           |
| Enzyme           | Immune inhibitor A<br>metalloproteinase                   | Undetermined                                         | -                                                  |
|                  |                                                           | inhA                                                 | -                                                  |
|                  | Pho                                                       | plcA                                                 | -                                                  |
|                  | Phosphatidylinositol-specific<br>phospholipase C (PI-PLC) | pipIc                                                | -                                                  |
|                  | Sphingomyelinase (SMase)                                  | sph                                                  | -                                                  |
|                  | Streptococcal<br>enolase(Streptococcus)                   | eno                                                  | orf00802                                           |
| Immune evasion   | B. cereus exo-polysaccharide (BPS)                        | bpsA、bpsB、bpsC、bpsD、<br>bpsE、bpsF、bpsG、bpsH、<br>bpsX | -                                                  |
|                  | Hyaluronic acid (HA) capsule                              | hasA、hasB、hasC                                       | -                                                  |
|                  | Polyglutamic acid capsule                                 | capA、capB、capC、capD、<br>capE                         | -                                                  |
|                  | Capsule(Streptococcus)                                    | cps4I                                                | orf00192                                           |
|                  |                                                           | cps2T                                                | orf00201                                           |
|                  |                                                           | rmlA                                                 | orf00206; orf00222                                 |
|                  |                                                           | rmlB                                                 | orf00208                                           |
|                  |                                                           | rfbD                                                 | orf00209                                           |
|                  |                                                           | epsE                                                 | orf00215                                           |
|                  |                                                           | cpsY                                                 | orf00747                                           |
|                  | Polysaccharide capsule                                    | Undetermined                                         | orf02158; orf02819;<br>orf02860                    |
| Iron acquisition | Bacillibactin                                             | dhbA、dhbB、dhbC、dhbE、<br>dhbF                         | -                                                  |
|                  | Hal                                                       | hal                                                  | -                                                  |
|                  | IlsA                                                      | ilsA                                                 | -                                                  |
|                  |                                                           | asbA、asbB、asbC、asbD、<br>asbE、asbF                    | -                                                  |
| Regulation       | AcpAB                                                     | acpA、acpB                                            | -                                                  |
|                  | AtxA                                                      | atxA                                                 | -                                                  |
|                  | PagR-XO1                                                  | pagR-XO1                                             | -                                                  |

|                                                                                                                       |                                                                                  |                                             |          |
|-----------------------------------------------------------------------------------------------------------------------|----------------------------------------------------------------------------------|---------------------------------------------|----------|
|                                                                                                                       | PagR-XO2                                                                         | pagR-XO2                                    | -        |
|                                                                                                                       | PlcR-PapR quorum sensing                                                         | papR、 plcR                                  | -        |
|                                                                                                                       | LisR/LisK(Listeria)                                                              | lisR                                        | orf00468 |
| Secretion system                                                                                                      | Type VII secretion system                                                        | essC、 esxB、 esxL                            | -        |
|                                                                                                                       | T6SS-II(Klebsiella)                                                              | clpB                                        | orf00786 |
| Toxin                                                                                                                 | Anthrax toxin                                                                    | Cya、 Lef、 pagA                              | -        |
|                                                                                                                       | Anthrolysin O/Cereolysin<br>O/Hemolysin I                                        | alo                                         | -        |
|                                                                                                                       | Cereulide                                                                        | cesA、 cesB、 cesC、 cesD、<br>cesH、 cesP、 cesT | -        |
|                                                                                                                       | Certhrax                                                                         | cer                                         | -        |
|                                                                                                                       | Cytotoxin K (Hemolysin IV)                                                       | cytK                                        | -        |
|                                                                                                                       | Hemolysin II                                                                     | hlyII                                       | -        |
|                                                                                                                       | Hemolysin III homolog                                                            | Undetermined                                | -        |
|                                                                                                                       | Hemolysin III                                                                    | hlyIII                                      | -        |
|                                                                                                                       | Hemolytic enterotoxin HBL                                                        | hblA、 hblC、 hblD                            | -        |
|                                                                                                                       | Insecticidal crystalline toxins                                                  | Cry、 Cyt、 vip                               | -        |
|                                                                                                                       | Non-hemolytic enterotoxin (Nhe)                                                  | nheA、 nheB、 nheC                            | -        |
|                                                                                                                       | Phytotoxin<br>phaseolotoxin(Pseudomonas)                                         | cysC1                                       | orf00351 |
|                                                                                                                       | Hemolysin(Clostridium)                                                           |                                             | orf00522 |
| Antiphagocytosis                                                                                                      | Capsule(Enterococcus)<br>Capsule(Klebsiella)                                     | cpsI                                        | orf00227 |
|                                                                                                                       |                                                                                  | gnd                                         | orf00466 |
|                                                                                                                       |                                                                                  |                                             | orf00916 |
|                                                                                                                       |                                                                                  | cpsJ                                        | orf02568 |
| Bile resistance                                                                                                       | Bile-salt hydrolase(Listeria)                                                    | bsh                                         | orf02198 |
| Invasion                                                                                                              | Cell wall teichoic acid<br>glycosylation protein(Listeria)                       | gtcA                                        | orf01556 |
| Manganese<br>uptake                                                                                                   | Pneumococcal surface antigen A /<br>Metal binding protein<br>SloC(Streptococcus) | psaA                                        | orf00123 |
| Phagosome<br>arresting                                                                                                | Nucleoside diphosphate<br>kinase(Mycobacterium)                                  | ndk                                         | orf02475 |
| Protease                                                                                                              | Trigger factor(Streptococcus)                                                    | tig/ropA                                    | orf01024 |
|                                                                                                                       | Serine protease(Streptococcus)                                                   | htrA/degP                                   | orf02301 |
| Stress adaptation                                                                                                     | Catalase(Neisseria)                                                              | katA                                        | orf02226 |
| Surface protein<br>anchoring                                                                                          | Lipoprotein diacylglyceryl<br>transferase(Listeria)                              | lgt                                         | orf02858 |
| Table saved from VFDB ( <a href="http://www.mgc.ac.cn/VFs/">http://www.mgc.ac.cn/VFs/</a> ) [Fri Jul 7 11:13:13 2023] |                                                                                  |                                             |          |

Supplementary Figure S1. Prediction of CRISPR structural positions in the LP18 genome

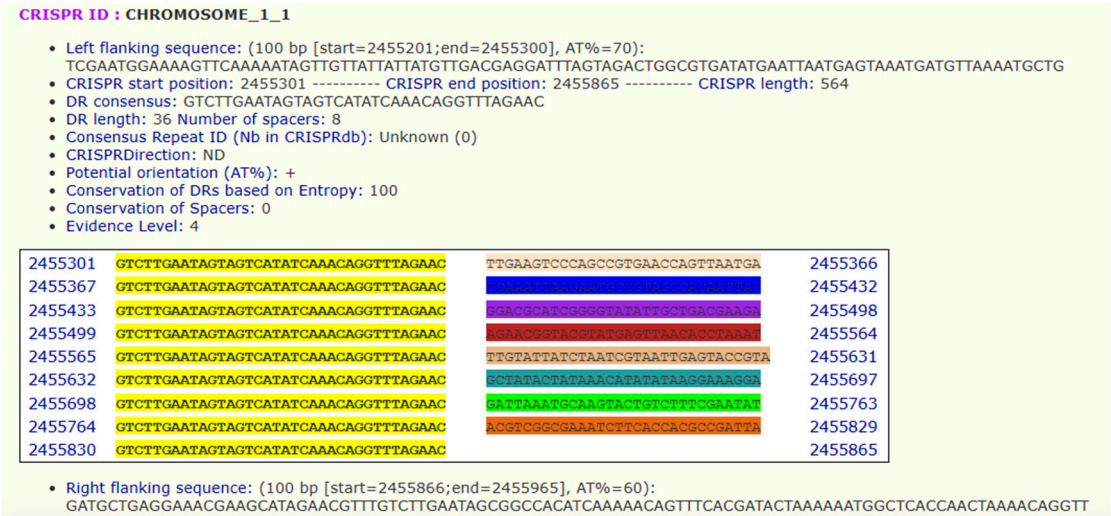

Supplement: s1 [file s1]
